# Supplementary material for: Prevalence of Cryptosporidium, microsporidia and Isospora infection in HIV-infected people: a global systematic review and meta-analysis
Source: PubMed Central journal article supplement (PMC5759777; doi:10.1186/s13071-017-2558-x), 2018-01-09

**Additional file 4: Figure S3.** Random-effect meta-analysis of *Isospora* infection in HIV-infected people when the three studies affecting the prevalence of *Isospora* were excluded.

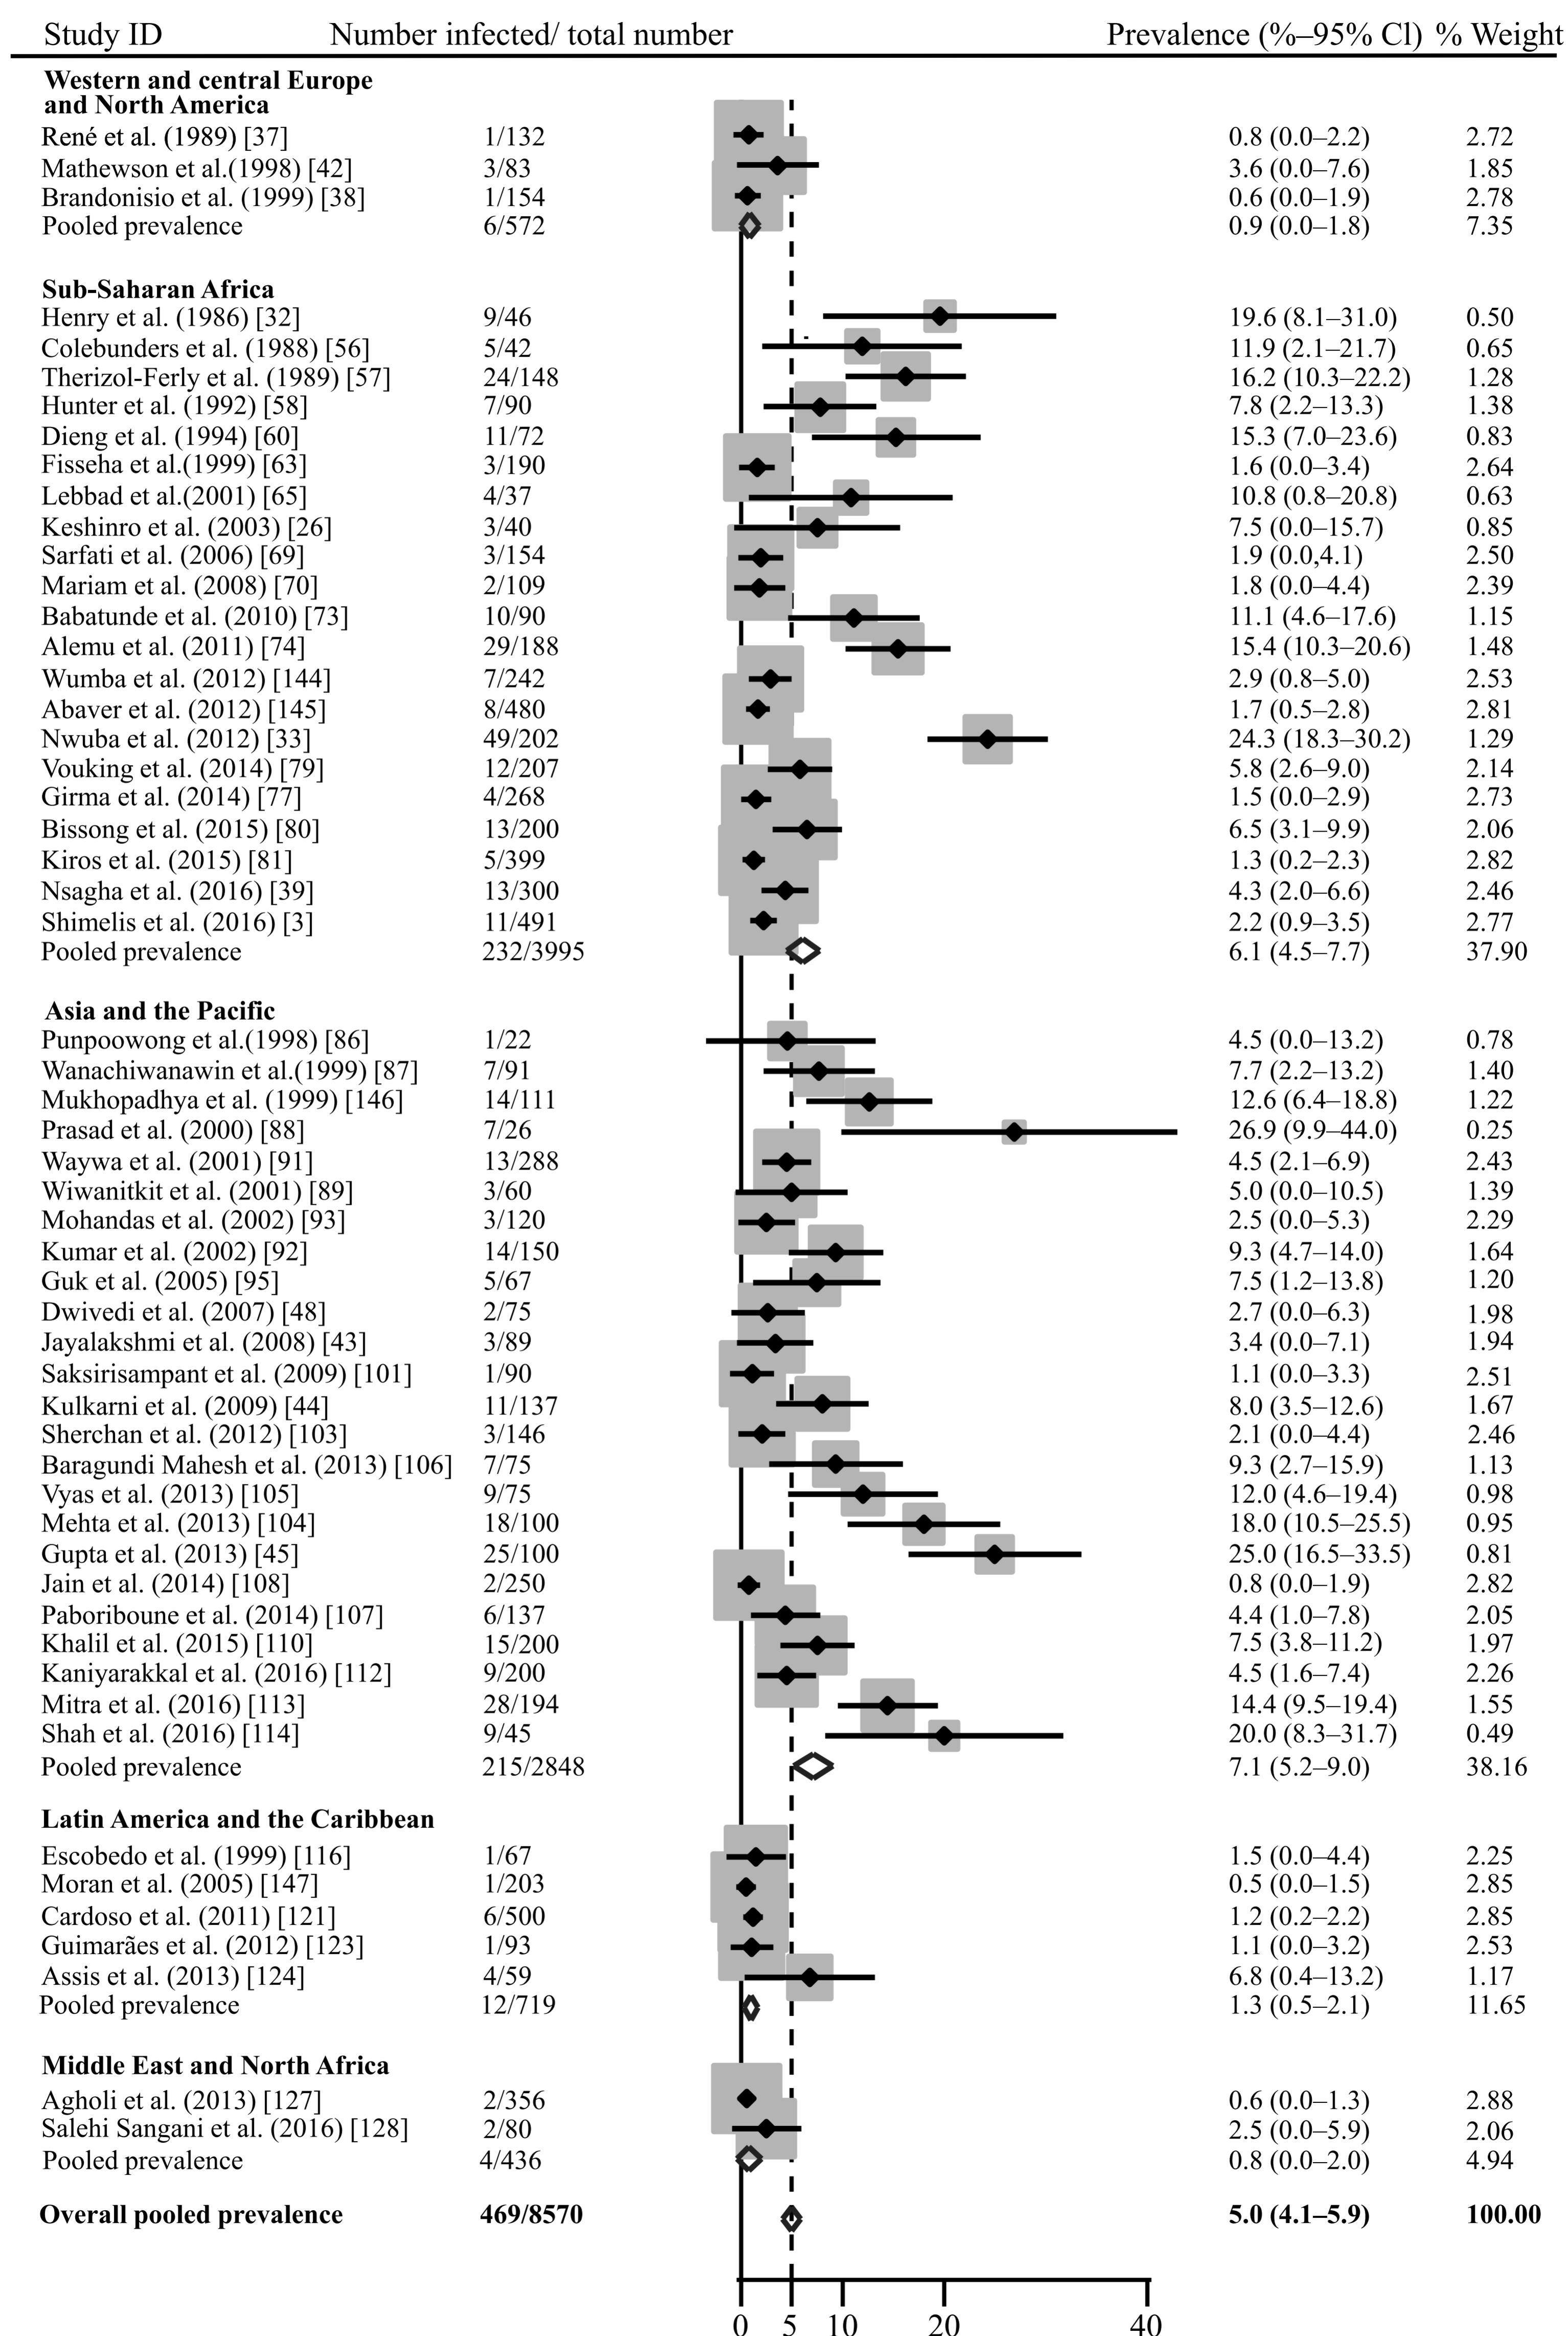

Supplement: 13071_2017_2558_MOESM4_ESM.pdf [file 13071_2017_2558_MOESM4_ESM.pdf]
